# Supplementary material for: In vivo single-molecule analysis reveals COOLAIR RNA structural diversity
Source: PubMed Central journal article supplement (PMC9452300; doi:10.1038/s41586-022-05135-9), 2022-08-17

**Supplementary information**

---

**In vivo single-molecule analysis reveals  
*COOLAIR* RNA structural diversity**

---

In the format provided by the  
authors and unedited

1 **Supplementary Discussion**

2 ***In vivo* single-molecule analysis reveals *COOLAIR* RNA structural diversity**

3

4 Minglei Yang<sup>1,2</sup>, Pan Zhu<sup>1,2</sup>, Jitender Cheema<sup>1</sup>, Rebecca Bloomer<sup>1</sup>, Pawel Mikulski<sup>1</sup>, Qi Liu<sup>1</sup>,  
5 Yueying Zhang<sup>1</sup>, Caroline Dean<sup>1\*</sup> & Yiliang Ding<sup>1\*</sup>

6 <sup>1</sup> John Innes Centre, Norwich Research Park, Norwich, NR4 7UH, UK.

7 <sup>2</sup> These authors contributed equally: Minglei Yang and Pan Zhu

8 \*Correspondence to: Caroline Dean ([caroline.dean@jic.ac.uk](mailto:caroline.dean@jic.ac.uk)) and Yiliang Ding  
9 ([yiliang.ding@jic.ac.uk](mailto:yiliang.ding@jic.ac.uk))

10

11 **Solving *in vivo* RNA structure conformation at the single molecule level.**

12

13 The structure is an intrinsic property of an RNA molecule that serves to provide important  
14 functional information beyond its nucleotide sequence. Since 2010, a variety of high-  
15 throughput (mostly illumina-based short-read sequencing) RNA structure profiling methods  
16 have transformed the scope of RNA structure studies, enabling genome-wide RNA structure  
17 analyses<sup>1</sup>. However, there are still three main challenges to decipher the RNA structure *in vivo*.

18

19 The isoform heterogeneity is a major challenge to accurately assign RNA structural  
20 information to individual gene-linked isoforms. 90% of human genes<sup>2</sup> and 60% *Arabidopsis*  
21 genes<sup>2</sup> produce alternatively spliced transcripts. The RNA structural information within the  
22 shared regions between isoforms cannot be distinguished by short read sequencing platforms  
23 (e.g., Illumina). Our smStructure-seq addresses this challenge by using the PacBio sequencing  
24 method. The sequencing principle of the PacBio platform allows the accurate assignment of  
25 different transcript isoforms<sup>3-6</sup>, since there is no assembly step.

26

27 The second challenge is to determine the RNA structural information for single molecules.  
28 RNA structures adopt multiple conformations. The single-molecule structural information can  
29 not only discriminate RNAs with very similar sequence (e.g, isoform or RNA sub-genome in  
30 viruses), but facilitate the identification of RNA structural diversity (the third challenge of  
31 RNA structure analysis). Recently, a Nanopore-based method, PORE-cupine<sup>7</sup> was developed  
32 to address these challenges. The long-read Nanopore sequencing captures structures along the  
33 whole length of each isoform<sup>7</sup>. However, the macromolecules in the Nanopore channel can be  
34 occupied by multiple bases at one time, increasing uncertainty in signal assignment of the  
35 nucleotides<sup>7,8</sup>. Besides, Nanopore has an averaged error rate of 14% for both direct RNA and  
36 cDNA sequencing<sup>9</sup>, which cannot achieve the single-molecule accuracy. In contrast, PacBio  
37 platform used by smStructure-seq can achieve 99.9% accuracy at the nucleotide level<sup>2</sup>,  
38 facilitating the accurate derivation of RNA structure for each single RNA molecule. The  
39 accurate single-molecule read is the foundation to decipher the conformation diversity at the  
40 single-molecule level.

41

42 The RNA structure can dynamically change *in vivo* by adopting different conformations.  
43 Directly dissecting the diversity of different RNA structural conformations remains  
44 challenging. Two new computational approaches, DREEM<sup>10</sup> and DRACO<sup>11</sup> were developed  
45 trying to solve this problem. DREEM<sup>10</sup> used an expectation–maximization regime to detect the  
46 RNA structure conformation while DRACO<sup>11</sup> used an alternative method based on a new  
47 clustering regime. These two computational methods were developed to estimate structural  
48 conformations based on the Illumina-based platform. Due to the limitation of short read  
49 sequencing, the direct dissection of RNA structural conformations has so far only been  
50 achieved for short RNA fragments (200-300nt)<sup>10</sup>, although in theory these methods could be

51 improved for long transcripts. These two computational approaches deduce the RNA structure  
52 conformation by clustering the chemical reactivity profiles. The chemical reactivity-based  
53 clustering methods tend to generate two mutation profiles with one extreme high chemical  
54 modification (more single-stranded RNA structure) and one extreme low chemical  
55 modification (more double-stranded RNA structure). These clusters directly reflect the  
56 similarity of chemical modification efficiencies rather than directly represent the similarity of  
57 RNA structure *per se*.

58

59 smStructure-seq can solve these challenges by taking advantage of highly-accurate single-  
60 molecule sequencing, together with our new analysis method that directly clusters the *in vivo*  
61 RNA structures derived from the mutation profile of each single RNA molecule. This method  
62 named **D**etermination of the **V**ariation of RNA structure **c**onformation (DaVinci), incorporates  
63 the individual mutation profiles and derives the most-likely RNA structure conformation via a  
64 stochastic context-free grammar (SCFG) algorithm independent of thermodynamic parameters.  
65 Then the whole conformation space is identified and visualized via dimensionality reduction  
66 analysis, e.g., PCA or MDS (**Extended Data Fig. 2a and Methods**). Thus, using the DaVinci  
67 method we can accurately deduce structural conformation of each single RNA molecule.

68

69 To demonstrate the power of DaVinci, we performed our method on the HIV-1 Rev response  
70 element (RRE) that has been reported to be able to adopt alternative conformations promoting  
71 different rates of virus replication<sup>12</sup>. DREEM used chemical reactivity-based clustering  
72 methods and identified two extreme conformations (conformation 1 and conformation 2 in  
73 **Extended Data Fig. 2d**)<sup>10</sup>. However, DaVinci could identify at least three conformations  
74 (conformation 1, 2 and 3 in **Extended Data Fig. 2b, d**) including an extra cryptic conformation<sup>13</sup>  
75 i.e., conformation 3 that cannot be identified by chemical reactivity-based clustering methods,

76 e.g., DREEM<sup>10</sup>. Conformation 3 was first reported in mutant RRE6<sup>13</sup> and has the ability to  
77 confer RevM10 resistance<sup>13</sup>. However, this RNA structure is not exclusive to mutant RRE61  
78 but present in wild-type RRE as well. We generate *in silico* RNA structure ensembles on wild-  
79 type RRE and mutation RRE61 by Boltzmann sampling (10,000 times) using RNAfold<sup>14</sup>.  
80 Three structural clusters (Extended Data Fig. 2b) were found with conformation 3 being the  
81 least abundant (1%) in RRE. With the mutant RRE61<sup>13</sup>, conformation 3 increased to 95.6%  
82 (Extended Data Fig. 2c). Thus, the wild-type RRE sequence has the potential to fold into the  
83 rare conformation 3 with the mutation converting it to the dominant conformation.

84

85 To experimentally confirm the conformational change caused by the mutations in RRE61, we  
86 folded the RRE61 RNA *in vitro* and probed the structure<sup>10</sup>. We then performed our DaVinci  
87 analysis and found that conformation 3 increased to 81% (Extended Data Fig. 2e) from 2% in  
88 RRE<sup>10</sup> (Extended Data Fig. 2d). DaVinci directly measures the percentage of clusters by  
89 counting each single RNA structure derived from the probing data and this contrasts with *in*  
90 *silico* RNA structure ensemble analysis, where Boltzmann sampling measures the percentage  
91 using a function of free energy. Thus, DaVinci analysis can estimate accurate proportions and  
92 distributions of each conformation cluster. Our analysis also confirms that mutations or single  
93 nucleotide polymorphisms (SNP) can alter the RNA structural ensemble and change the  
94 proportion of different conformations<sup>15-17</sup>.

95

96 A second example comes from the analysis of TPP riboswitch, a typical RNA molecule which  
97 can fold into alternative structures depending on the presence of the TPP ligand<sup>18-20</sup>. We  
98 performed the RNA structure probing experiments on *in vitro* folded TPP riboswitch RNAs  
99 (TenA gene in *B. subtilis*) in the absence or presence of TPP ligand. After the treatment of the  
100 SHAPE chemicals (NAI), we merged the NAI-modified RNA samples (TPP-treated and non

101 TPP-treated RNAs) with a ratio of 20:80 (vol/vol) or 50:50 (vol/vol) and conducted the library  
102 constructions, respectively. We then performed our DaVinci analysis on the obtained  
103 sequencing data and found that DaVinci closely reflects the different ratio of the two alternative  
104 conformations (Conformation 1 is related to the TPP-treated conformation and Conformation  
105 2 is related to the non TPP-treated one) with the ratios of 29:71 or 40:60 (Extended Data Fig.  
106 2f-h). Overall, DaVinci accurately detects RNA structural conformations. The slight difference  
107 between the expected ratios and the DaVinci-derived ratios is likely to reflect the equilibrium  
108 of the conformations during the RNA structure probing in the solutions.

109

110 To further test DaVinci, we exploited a published dataset on RNA structure probing of  
111 Escherichia coli cspA 5' untranslated region (UTR). This UTR functions as an RNA  
112 thermometer since it can switch states between translationally repressed conformations  
113 (conformation 3 and 4) at 37 °C and translationally competent conformations (conformation 1  
114 and 2) at 10 °C<sup>21,22</sup>. DaVinci results showed that the translationally competent conformations  
115 (conformation 1 and 2) increased from 23% to 67% upon transfer from 37 °C to 10 °C. These  
116 two conformations have been previously detected after the cold treatments<sup>22</sup>. DaVinci also  
117 identified an extra conformation 3, which is very similar to the major conformation 4<sup>22</sup> at 37 °C.  
118 Compared with the conformation 4, conformation 3 loses a short stem loop, further indicating  
119 that DaVinci is sensitive to detect less abundant RNA structural conformations.

120

121 These results showed that DaVinci can identify the dynamic nature of *in vivo* RNA structure  
122 conformations, facilitating the investigation of the RNA structural conformation functionality  
123 *in vivo*.

124

125 Therefore, our smStructure-seq allied with DaVinci analysis pipeline can address the  
126 challenges of both heterogeneities of isoforms and structural conformations simultaneously  
127 and thus is capable of generating single-molecule RNA structure conformations for each RNA  
128 transcript (e.g., isoform).

129

### 130 **References**

- 131 1. Zhang, H. & Ding, Y. Novel insights into the pervasive role of RNA structure in post-  
132 transcriptional regulation of gene expression in plants. *Biochem. Soc. Trans.* **49**, 1829–  
133 1839 (2021).
- 134 2. Pan, Q., Shai, O., Lee, L. J., Frey, B. J. & Blencowe, B. J. Deep surveying of  
135 alternative splicing complexity in the human transcriptome by high-throughput  
136 sequencing. *Nat. Genet.* **40**, 1413–1415 (2008).
- 137 3. Zhao, L. *et al.* Analysis of transcriptome and epitranscriptome in plants using PacBio  
138 Iso-Seq and Nanopore-based direct RNA sequencing. *Front. Genet.* **10**, 1–14 (2019).
- 139 4. An, D., Cao, H., Li, C., Humbeck, K. & Wang, W. Isoform sequencing and state-of-art  
140 applications for unravelling complexity of plant transcriptomes. *Genes (Basel)*. **9**, 43  
141 (2018).
- 142 5. Mays, A. D. *et al.* Single-molecule real-time (SMRT) full-length RNA-sequencing  
143 reveals novel and distinct mRNA isoforms in human bone marrow cell subpopulations.  
144 *Genes (Basel)*. **10**, 253 (2019).
- 145 6. Wenger, A. M. *et al.* Accurate circular consensus long-read sequencing improves  
146 variant detection and assembly of a human genome. *Nat. Biotechnol.* **37**, 1155–1162  
147 (2019).
- 148 7. Aw, J. G. A. *et al.* Determination of isoform-specific RNA structure with nanopore  
149 long reads. *Nat. Biotechnol.* **39**, 336–346 (2021).

- 150 8. Branton, D. *et al.* The potential and challenges of nanopore sequencing. *Nature*  
151 *Biotechnology* **26**, 1146–1153 (2008).
- 152 9. Workman, R. E. *et al.* Nanopore native RNA sequencing of a human poly(A)  
153 transcriptome. *Nat. Methods* **16**, 1297–1305 (2019).
- 154 10. Tomezsko, P. J. *et al.* Determination of RNA structural diversity and its role in HIV-1  
155 RNA splicing. *Nature* **582**, 438–442 (2020).
- 156 11. Morandi, E. *et al.* Genome-scale deconvolution of RNA structure ensembles. *Nat.*  
157 *Methods* **18**, 249–252 (2021).
- 158 12. Sherpa, C., Rausch, J. W., Le Grice, S. F. J., Hammarskjold, M. L. & Rekosh, D. The  
159 HIV-1 Rev response element (RRE) adopts alternative conformations that promote  
160 different rates of virus replication. *Nucleic Acids Res.* **43**, 4676–4686 (2015).
- 161 13. Legiewicz, M. *et al.* Resistance to RevM10 inhibition reflects a conformational switch  
162 in the HIV-1 Rev response element. *Proc. Natl. Acad. Sci. U. S. A.* **105**, 14365–14370  
163 (2008).
- 164 14. Hofacker, I. *et al.* Fast folding and comparison of RNA secondary structures. *Monatsh*  
165 *Chem (Chem Mon.* **125**, 167–188 (1994).
- 166 15. Halvorsen, M., Martin, J. S., Broadaway, S. & Laederach, A. Disease-associated  
167 mutations that alter the RNA structural ensemble. *PLoS Genet.* **6**, e1001074 (2010).
- 168 16. Martin, J. S. *et al.* Structural effects of linkage disequilibrium on the transcriptome.  
169 *RNA* **18**, 77–87 (2012).
- 170 17. Linnstaedt, S. D. *et al.* A functional riboSNitch in the 3' untranslated region of FKBP5  
171 alters microRNA-320a binding efficiency and mediates vulnerability to chronic post-  
172 traumatic pain. *J. Neurosci.* **38**, 8407–8420 (2018).
- 173 18. Edwards, T. E. & Ferré-D'Amaré, A. R. Crystal structures of the thi-box riboswitch  
174 bound to thiamine pyrophosphate analogs reveal adaptive RNA-small molecule



- 175 recognition. *Structure* **14**, 1459–1468 (2006).
- 176 19. Quarta, G., Kim, N., Izzo, J. A. & Schlick, T. Analysis of riboswitch structure and  
177 function by an energy landscape framework. *J. Mol. Biol.* **393**, 993–1003 (2009).
- 178 20. Manzourolajdad, A. & Arnold, J. Secondary structural entropy in RNA switch  
179 (Riboswitch) identification. *BMC Bioinformatics* **16**, (2015).
- 180 21. Giuliadori, A. M. *et al.* The cspA mRNA is a thermosensor that modulates translation  
181 of the cold-shock protein cspA. *Mol. Cell* **37**, 21–33 (2010).
- 182 22. Zhang, Y. *et al.* A stress response that monitors and regulates mRNA structure is  
183 central to cold shock adaptation. *Mol. Cell* **70**, 274-286.e7 (2018).
- 184

Extended Data Fig.8a

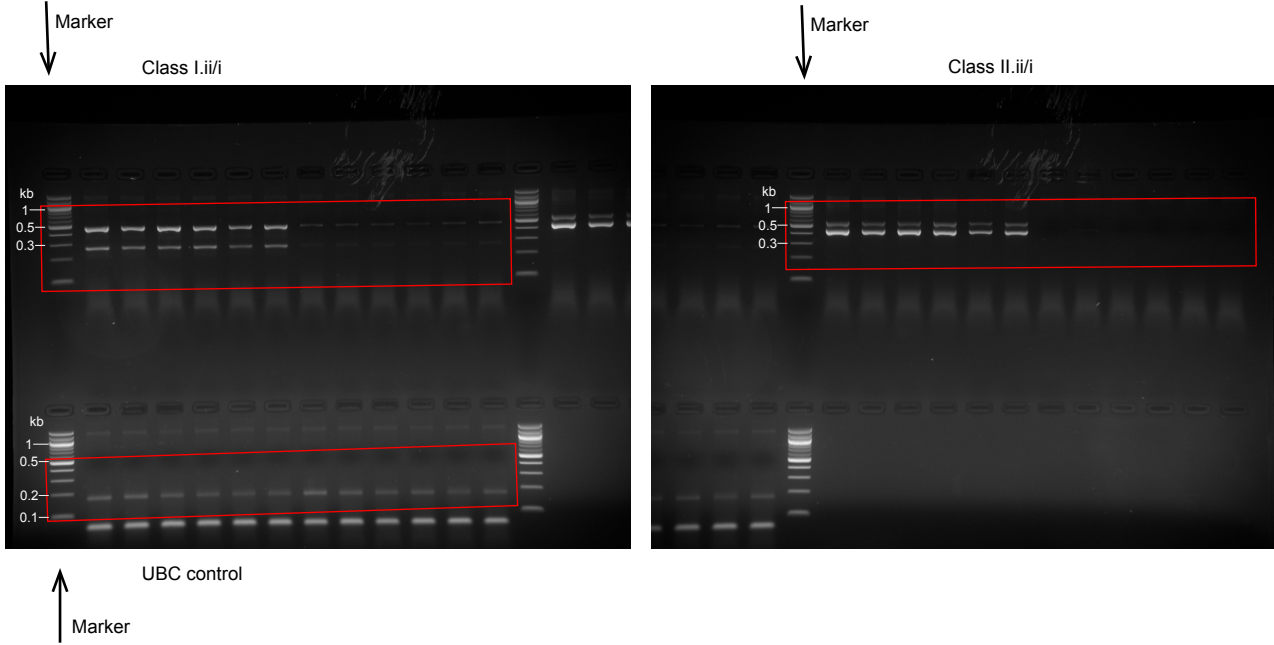

Extended Data Fig. 9

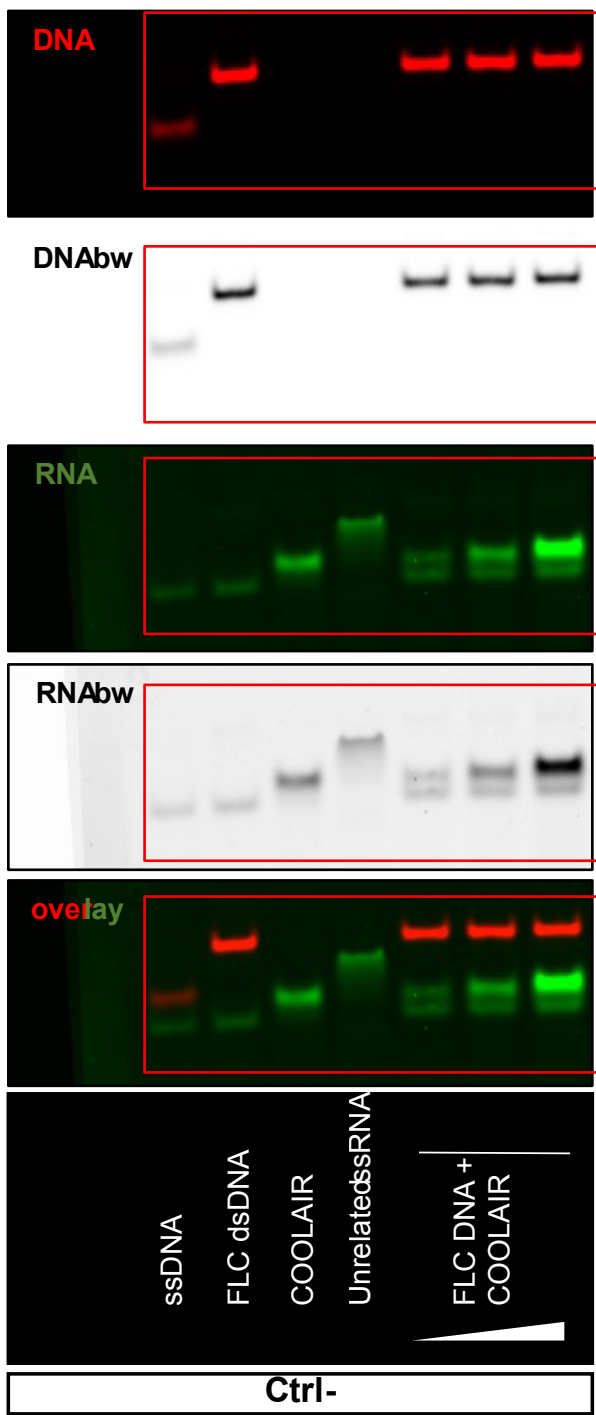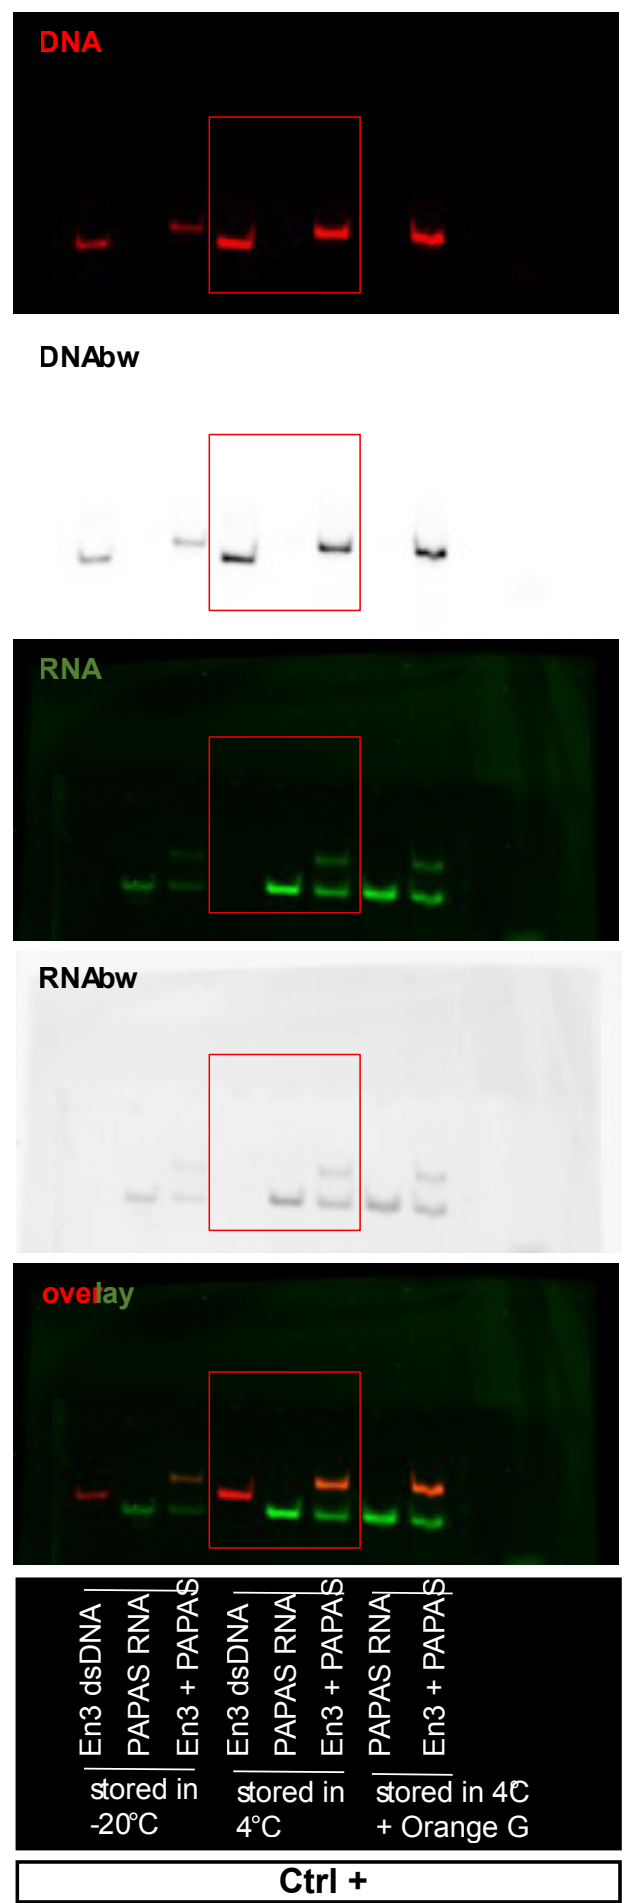

Extended Data Fig. 9

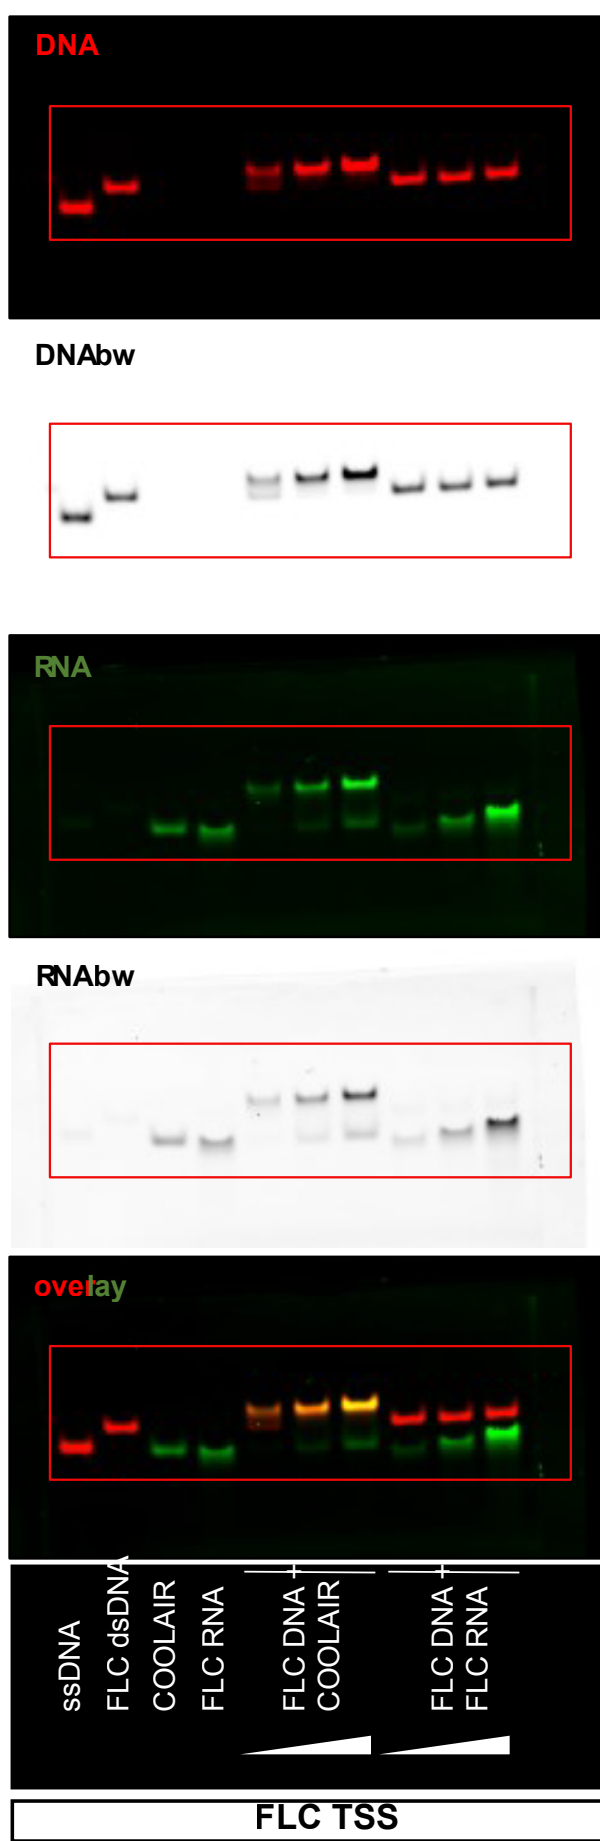

Supplement: 41586_2022_5135_MOESM1_ESM.pdf [file 41586_2022_5135_MOESM1_ESM.pdf]
